# Supplementary material for: Visual acuity time in range: a novel concept to describe consistency in treatment response in diabetic macular oedema
Source: Springer Nature journal article supplement (doi:10.1038/s41433-023-02507-x), 2023-03-28
Supplement: MOESM1 [file 41433_2023_2507_MOESM1_ESM.pdf]

## **A Novel Concept to Describe Consistency in Treatment Response in Diabetic Macular Oedema**

Igor Kozak, Ian Pearce, Chui Ming Gemmy Cheung, Tobias Machewitz, George N. Lambrou, Daniel Molina, Lima Suleiman, Hossam Youssef, Neil M. Bressler

**Supplemental Table 1.** Frequency of BCVA assessments between Day 0–364 and Day 365–728

**Supplemental Table 2.** Participant baseline demographics and disease characteristics

**Supplemental Fig. 1.** Mean ( $\pm$ SEM) time in range for intravitreal aflibercept, bevacizumab, and ranibizumab according to BCVA letter score thresholds of  $\geq 59$ ,  $\geq 69$ , and  $\geq 79$  (approximate Snellen equivalent of 20/63, 20/40, and 20/25 or better, respectively) in the Day 365–728 analysis for **(A)** the overall population and **(B)** according to baseline BCVA, and in the Day 0–728 analysis for **(C)** the overall population and **(D)** according to baseline BCVA

**Supplemental Fig. 2.** Mean time in range with intravitreal aflibercept, bevacizumab, and ranibizumab according to BCVA threshold in the **(A)** Day 365–728 and **(B)** Day 0–728 analyses

**Supplemental Fig. 3.** Responder analysis based on the proportion of participants who spent time in range above a BCVA letter score threshold of  $\geq 69$  (approximate Snellen equivalent of 20/40 or better) for various cut-offs of the proportion of time in range within the treatment period in the **(A)** Day 365–728 analysis and **(B)** Day 0–728 analysis

**Supplemental Table 1.** Frequency of BCVA assessments between Day 0–364 and Day 365–728.

|                                      | Day 0–364            |                      |                      | Day 365–728          |                      |                      |
|--------------------------------------|----------------------|----------------------|----------------------|----------------------|----------------------|----------------------|
|                                      | IVT-AFL<br>(n = 224) | IVT-BEV<br>(n = 218) | IVT-RAN<br>(n = 218) | IVT-AFL<br>(n = 224) | IVT-BEV<br>(n = 218) | IVT-RAN<br>(n = 218) |
| <b>Number of BCVA assessments</b>    |                      |                      |                      |                      |                      |                      |
| Mean±SD                              | 12.5±2.4             | 12.6±2.1             | 12.4±2.3             | 8.6±3.8              | 8.6±3.9              | 8.6±3.9              |
| Median                               | 13.0                 | 13.0                 | 13.0                 | 9.0                  | 9.0                  | 9.0                  |
| Range                                | 1–16                 | 1–17                 | 1–16                 | 0–18                 | 0–15                 | 0–15                 |
| <b>Total BCVA assessments, n (%)</b> |                      |                      |                      |                      |                      |                      |
| 0                                    | 0                    | 0                    | 0                    | 16 (7.1)             | 13 (6.0)             | 18 (8.3)             |
| 1                                    | 3 (1.3)              | 1 (0.5)              | 1 (0.5)              | 1 (0.4)              | 4 (1.8)              | 4 (1.8)              |
| 2                                    | 3 (1.3)              | 1 (0.5)              | 1 (0.5)              | 5 (2.2)              | 5 (2.3)              | 2 (0.9)              |
| 3                                    | 0                    | 1 (0.5)              | 1 (0.5)              | 2 (0.9)              | 9 (4.1)              | 4 (1.8)              |
| 4                                    | 1 (0.4)              | 0                    | 1 (0.5)              | 11 (4.9)             | 13 (6.0)             | 10 (4.6)             |
| 5                                    | 0                    | 1 (0.5)              | 2 (0.9)              | 16 (7.1)             | 12 (5.5)             | 7 (3.2)              |
| 6                                    | 1 (0.4)              | 1 (0.5)              | 3 (1.4)              | 5 (2.2)              | 15 (6.9)             | 18 (8.3)             |
| 7                                    | 2 (0.9)              | 3 (1.4)              | 3 (1.4)              | 14 (6.3)             | 13 (6.0)             | 16 (7.3)             |
| 8                                    | 4 (1.8)              | 3 (1.4)              | 4 (1.8)              | 20 (8.9)             | 21 (9.6)             | 22 (10.1)            |
| 9                                    | 3 (1.3)              | 7 (3.2)              | 4 (1.8)              | 23 (10.3)            | 13 (6.0)             | 18 (8.3)             |
| 10                                   | 3 (1.3)              | 3 (1.4)              | 6 (2.8)              | 23 (10.3)            | 22 (10.1)            | 15 (6.9)             |
| 11                                   | 19 (8.5)             | 10 (4.6)             | 7 (3.2)              | 31 (13.8)            | 27 (12.4)            | 26 (11.9)            |
| 12                                   | 23 (10.3)            | 31 (14.2)            | 35 (16.1)            | 40 (17.9)            | 28 (12.8)            | 31 (14.2)            |
| 13                                   | 81 (36.2)            | 90 (41.3)            | 90 (41.3)            | 12 (5.4)             | 17 (7.8)             | 22 (10.1)            |
| 14                                   | 77 (34.4)            | 61 (28.0)            | 56 (25.7)            | 2 (0.9)              | 4 (1.8)              | 3 (1.4)              |
| 15                                   | 3 (1.3)              | 2 (0.9)              | 3 (1.4)              | 2 (0.9)              | 2 (0.9)              | 2 (0.9)              |
| 16                                   | 1 (0.4)              | 2 (0.9)              | 1 (0.5)              | 0                    | 0                    | 0                    |
| 17                                   | 0                    | 1 (0.5)              | 0                    | 0                    | 0                    | 0                    |
| 18                                   | 0                    | 0                    | 0                    | 1 (0.4)              | 0                    | 0                    |

BCVA best-corrected visual acuity, IVT-AFL intravitreal aflibercept, IVT-BEV intravitreal bevacizumab, IVT-RAN intravitreal ranibizumab, SD standard deviation.

**Supplemental Table 2.** Participant baseline demographics and disease characteristics.

|                                                   | Day 0–364 analysis   |                      |                      | Day 365–728 and 0–728 analysis |                      |                      | Overall Protocol T population |                      |                      |
|---------------------------------------------------|----------------------|----------------------|----------------------|--------------------------------|----------------------|----------------------|-------------------------------|----------------------|----------------------|
|                                                   | IVT-AFL<br>(n = 216) | IVT-BEV<br>(n = 213) | IVT-RAN<br>(n = 209) | IVT-AFL<br>(n = 200)           | IVT-BEV<br>(n = 187) | IVT-RAN<br>(n = 188) | IVT-AFL<br>(n = 224)          | IVT-BEV<br>(n = 218) | IVT-RAN<br>(n = 218) |
| <b>Age, mean±SD, years</b>                        | 59±11                | 61±10                | 59±11                | 60±10                          | 61±10                | 59±11                | 60±10                         | 62±10                | 60±11                |
| <b>Sex, n (%)</b>                                 |                      |                      |                      |                                |                      |                      |                               |                      |                      |
| Female                                            | 104 (48)             | 101 (47)             | 90 (43)              | 93 (47)                        | 92 (49)              | 81 (43)              | 110 (49)                      | 103 (47)             | 94 (43)              |
| <b>Race, n (%)</b>                                |                      |                      |                      |                                |                      |                      |                               |                      |                      |
| American Indian/Alaskan Native                    | 2 (<1)               | 0                    | 0                    | 2 (1)                          | 0                    | 0                    | 2 (<1)                        | 0                    | 0                    |
| Asian                                             | 2 (<1)               | 2 (<1)               | 3 (1)                | 2 (1)                          | 2 (<1)               | 2 (<1)               | 2 (<1)                        | 2 (<1)               | 4 (2)                |
| Black/African American                            | 29 (13)              | 35 (16)              | 35 (17)              | 27 (14)                        | 31 (17)              | 32 (17)              | 32 (14)                       | 37 (17)              | 37 (17)              |
| More than one race                                | 6 (3)                | 1 (<1)               | 1 (<1)               | 6 (3)                          | 1 (<1)               | 1 (<1)               | 6 (3)                         | 1 (<1)               | 1 (<1)               |
| Native Hawaiian/Other Pacific Islander            | 2 (<1)               | 2 (<1)               | 0                    | 1 (<1)                         | 1 (<1)               | 0                    | 2 (<1)                        | 2 (<1)               | 0                    |
| Unknown/not reported                              | 5 (2)                | 8 (34)               | 10 (45)              | 5 (3)                          | 7 (4)                | 9 (5)                | 6 (3)                         | 8 (4)                | 10 (5)               |
| White                                             | 170 (79)             | 165 (78)             | 160 (77)             | 157 (79)                       | 145 (78)             | 144 (77)             | 174 (78)                      | 168 (77)             | 166 (76)             |
| <b>Duration of diabetes, mean±SD, years</b>       | 16±11                | 17±10                | 17±10                | 16±11                          | 17±11                | 17±10                | 16±11                         | 17±10                | 17±10                |
| <b>Type of diabetes, n (%)</b>                    |                      |                      |                      |                                |                      |                      |                               |                      |                      |
| Type 1                                            | 22 (10)              | 12 (6)               | 15 (7)               | 22 (11)                        | 10 (5)               | 15 (8)               | 22 (10)                       | 12 (6)               | 16 (7)               |
| Type 2                                            | 188 (87)             | 200 (94)             | 188 (90)             | 172 (86)                       | 176 (94)             | 169 (90)             | 196 (88)                      | 205 (94)             | 196 (90)             |
| Unknown                                           | 6 (3)                | 1 (<1)               | 6 (3)                | 6 (3)                          | 1 (<1)               | 4 (2)                | 6 (3)                         | 1 (<1)               | 6 (3)                |
| <b>DRSS, n (%)</b>                                |                      |                      |                      |                                |                      |                      |                               |                      |                      |
| Missing                                           | 0                    | 2 (<1)               | 1 (<1)               | 0                              | 1 (<1)               | 1 (<1)               | 0                             | 2 (<1)               | 1 (<1)               |
| Absent or minimal NPDR (level 10-20)              | 7 (3)                | 6 (3)                | 3 (1)                | 7 (4)                          | 5 (3)                | 3 (2)                | 7 (3)                         | 6 (3)                | 5 (2)                |
| Mild to moderately severe NPDR (level 35, 43, 47) | 143 (66)             | 129 (61)             | 143 (68)             | 131 (66)                       | 113 (60)             | 127 (68)             | 150 (67)                      | 132 (61)             | 145 (67)             |
| Severe NPDR (level 53)                            | 16 (7)               | 14 (7)               | 16 (8)               | 13 (7)                         | 12 (6)               | 16 (9)               | 17 (8)                        | 15 (7)               | 18 (8)               |
| Prior PRP; without current PDR (level 60)         | 17 (8)               | 21 (10)              | 16 (8)               | 16 (8)                         | 17 (9)               | 15 (8)               | 17 (8)                        | 21 (10)              | 17 (8)               |
| Mild to moderate PDR (level 61 and 65)            | 28 (13)              | 30 (14)              | 22 (11)              | 28 (14)                        | 28 (15)              | 18 (10)              | 28 (13)                       | 31 (14)              | 23 (11)              |
| High-risk PDR (level 71 and 75)                   | 2 (<1)               | 7 (3)                | 8 (4)                | 2 (1)                          | 7 (4)                | 8 (4)                | 2 (<1)                        | 7 (3)                | 9 (4)                |
| Cannot grade                                      | 3 (1)                | 4 (2)                | 0                    | 3 (2)                          | 4 (2)                | 0                    | 3 (1)                         | 4 (2)                | 0                    |
| <b>HbA<sub>1c</sub>, mean±SD, %</b>               | 8.05±1.75            | 8.01±1.64            | 8.13±1.76            | 8.03±1.75                      | 7.94±1.57            | 8.21±1.77            | 8.06±1.76                     | 8.00±1.64            | 8.17±1.78            |
| <b>HbA<sub>1c</sub>, n (%)</b>                    |                      |                      |                      |                                |                      |                      |                               |                      |                      |
| <7%                                               | 59 (27)              | 64 (30)              | 57 (27)              | 54 (27)                        | 60 (32)              | 48 (26)              | 62 (28)                       | 65 (30)              | 58 (27)              |
| ≥7%                                               | 152 (70)             | 149 (70)             | 151 (72)             | 142 (71)                       | 127 (68)             | 140 (75)             | 157 (70)                      | 153 (70)             | 159 (73)             |
| <b>CRT, µm</b>                                    |                      |                      |                      |                                |                      |                      |                               |                      |                      |
| Mean±SD                                           | 457±134              | 456±130              | 455±118              | 455±133                        | 459±133              | 452±116              | 459±134                       | 455±129              | 456±119              |
| Median (range)                                    | 429 (290–1115)       | 419 (266–940)        | 432 (248–860)        | 427 (290–1115)                 | 419 (266–940)        | 430 (280–860)        | 430 (290–1115)                | 419 (266–940)        | 433 (248–860)        |
| <b>BCVA in study eye</b>                          |                      |                      |                      |                                |                      |                      |                               |                      |                      |
| Mean±SD ETDRS letter score                        | 65.1±11.6            | 64.7±11.1            | 64.6±11.4            | 65.1±11.7                      | 64.5±11.1            | 64.9±11.3            | 65.0±11.6                     | 64.9±11.0            | 64.6±11.4            |
| Approximate Snellen equivalent                    | 20/50                | 20/50                | 20/50                | 20/50                          | 20/50                | 20/50                | 20/50                         | 20/50                | 20/50                |
| Median (range) ETDRS letter score                 | 69.0 (78–24)         | 68.0 (78–24)         | 68.0 (78–29)         | 69.0 (78–24)                   | 68.0 (78–24)         | 68.5 (78–29)         | 69 (78–24)                    | 68 (78–24)           | 68 (78–29)           |
| Approximate Snellen equivalent                    | 20/40                | 20/40                | 20/40                | 20/40                          | 20/40                | 20/40                | 20/40                         | 20/40                | 20/50                |
|                                                   | (20/32–20/320)       | (20/32–20/320)       | (20/32–20/250)       | (20/32–20/320)                 | (20/32–20/320)       | (20/32–20/250)       | (20/32, 20/63)                | (20/40, 20/63)       | (20/40, 20/80)       |
| BCVA 68–0 (20/40 or worse), n (%)                 | 105 (49)             | 107 (50)             | 105 (50)             | 96 (48)                        | 95 (51)              | 94 (50)              | 112 (50)*                     | 107 (49)*            | 110 (50)*            |
| BCVA 100–69 (better than 20/40), n (%)            | 111 (51)             | 106 (50)             | 104 (50)             | 104 (52)                       | 92 (49)              | 94 (50)              | 112 (50)*                     | 111 (51)*            | 108 (5)*             |

\*As reported in Wells JA, Glassman AR, Ayala AR et al. Aflibercept, bevacizumab, or ranibizumab for diabetic macular oedema. N Engl J Med. 2015;372:1193-203 (20/50 or worse [letter score <69] and 20/40 or better [letter score ≥70]). BCVA best-corrected visual acuity, CRT central retinal thickness, DRSS Diabetic Retinopathy Severity Scale, ETDRS Early Treatment Diabetic Retinopathy Study, HbA<sub>1c</sub> 3-month average of blood glucose levels based on glycated haemoglobin measurements, IVT-AFL, intravitreal aflibercept, IVT-BEV intravitreal bevacizumab, IVT-RAN intravitreal ranibizumab, NPDR non-proliferative diabetic retinopathy, PDR proliferative diabetic retinopathy, SD, standard deviation.

**Supplemental Fig. 1.** Mean ( $\pm$ SEM) time in range for intravitreal aflibercept, bevacizumab, and ranibizumab according to BCVA letter score thresholds of  $\geq 59$ ,  $\geq 69$ , and  $\geq 79$  (approximate Snellen equivalent of 20/63, 20/40, and 20/25 or better, respectively) in the Day 365–728 analysis for (A) the overall population and (B) according to baseline BCVA, and in the Day 0–728 analysis for (C) the overall population and (D) according to baseline BCVA.

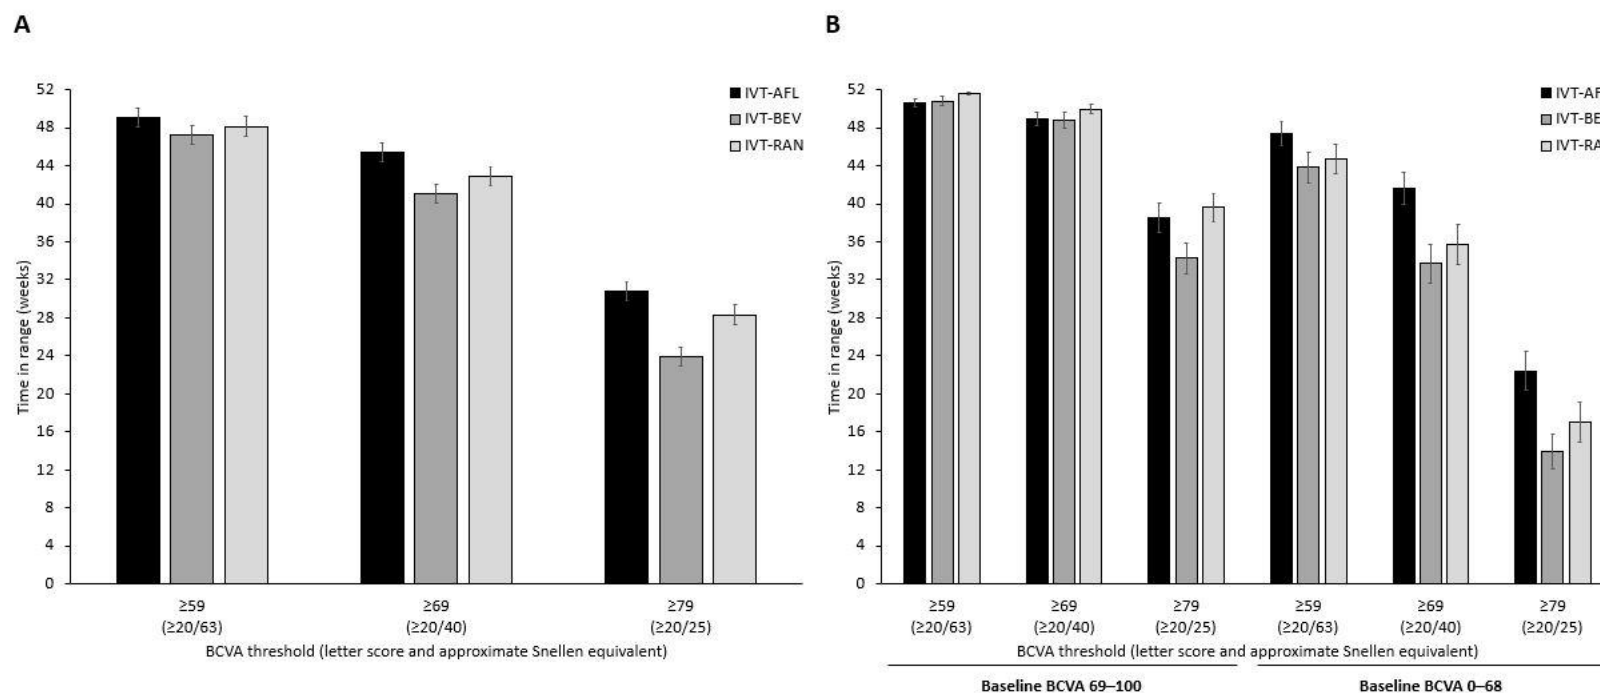

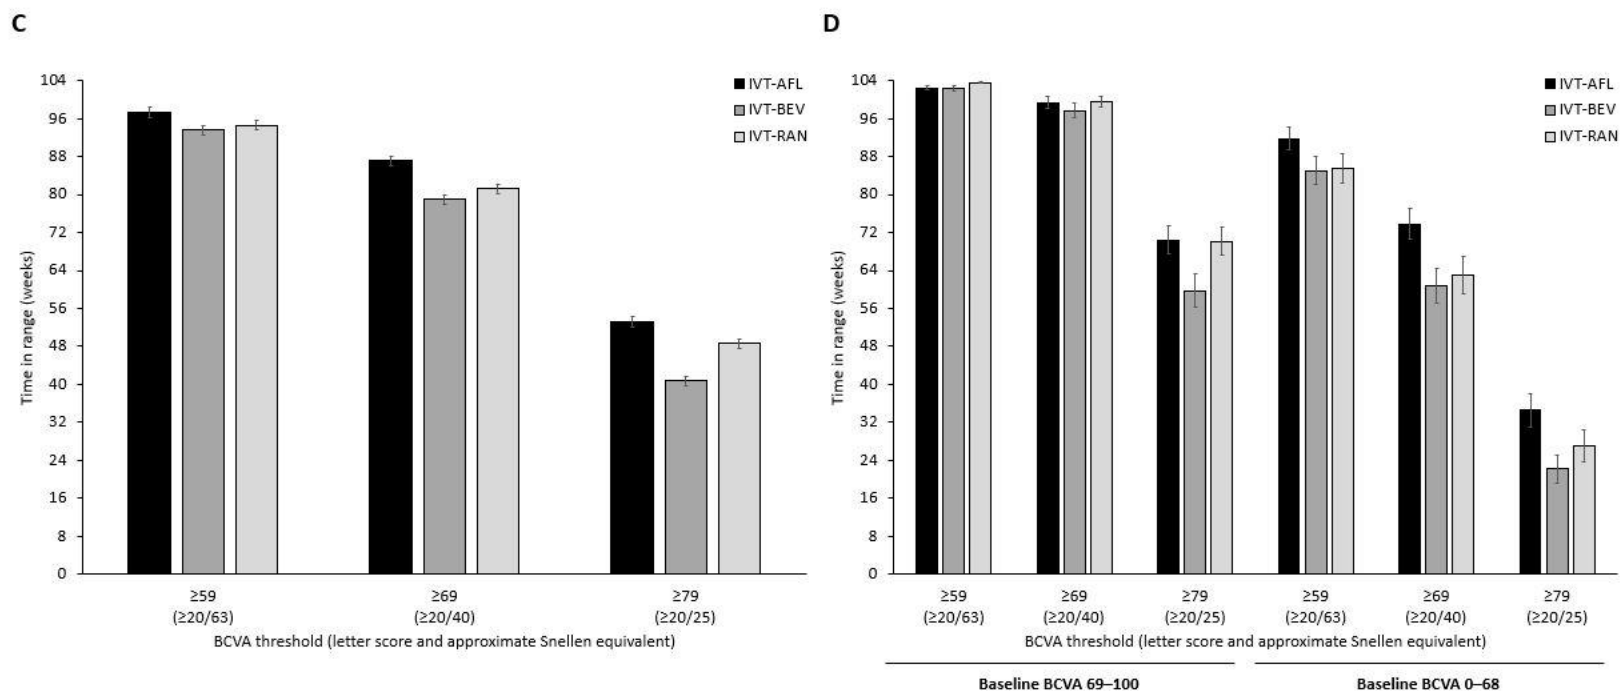

Of the 660 eyes included in Protocol T, 22 eyes were excluded from the Day 0–364 analysis because these participants had <7 BCVA assessments within this timeframe (approximately 1 VA assessment every 2 months); 85 eyes were excluded from the Day 0–728 and Day 365–728 analyses because participants had <4 assessments within Year 2.

BCVA best-corrected visual acuity, IVT-AFL intravitreal aflibercept, IVT-BEV intravitreal bevacizumab, IVT-RAN intravitreal ranibizumab, SEM standard error of the mean, VA visual acuity.

**Supplemental Fig. 2.** Mean time in range with intravitreal aflibercept, bevacizumab, and ranibizumab according to BCVA threshold in the (A) Day 365–728 and (B) Day 0–728 analyses.

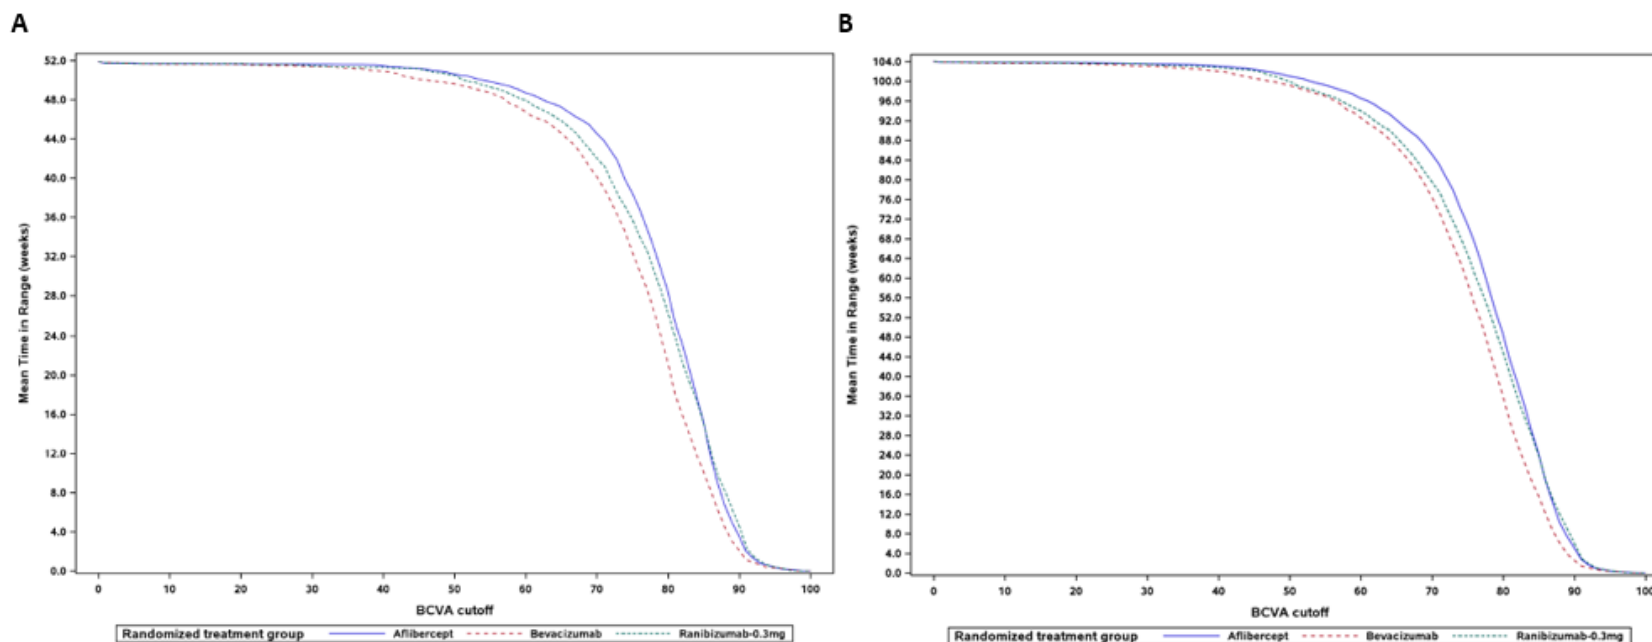

Of the 660 eyes included in Protocol T, 22 eyes were excluded from the Day 0–364 analysis because these participants had <7 BCVA assessments within this timeframe (approximately 1 VA assessment every 2 months); 85 eyes were excluded from the Day 0–728 and Day 365–728 analyses because participants had <4 assessments within Year 2.

BCVA best-corrected visual acuity, VA visual acuity.

**Supplemental Fig. 3.** Responder analysis based on the proportion of participants who spent time in range above a BCVA letter score threshold of  $\geq 69$  (approximate Snellen equivalent of 20/40 or better) for various cut-offs of the proportion of time in range within the treatment period in the (A) Day 365–728 analysis and (B) Day 0–728 analysis.

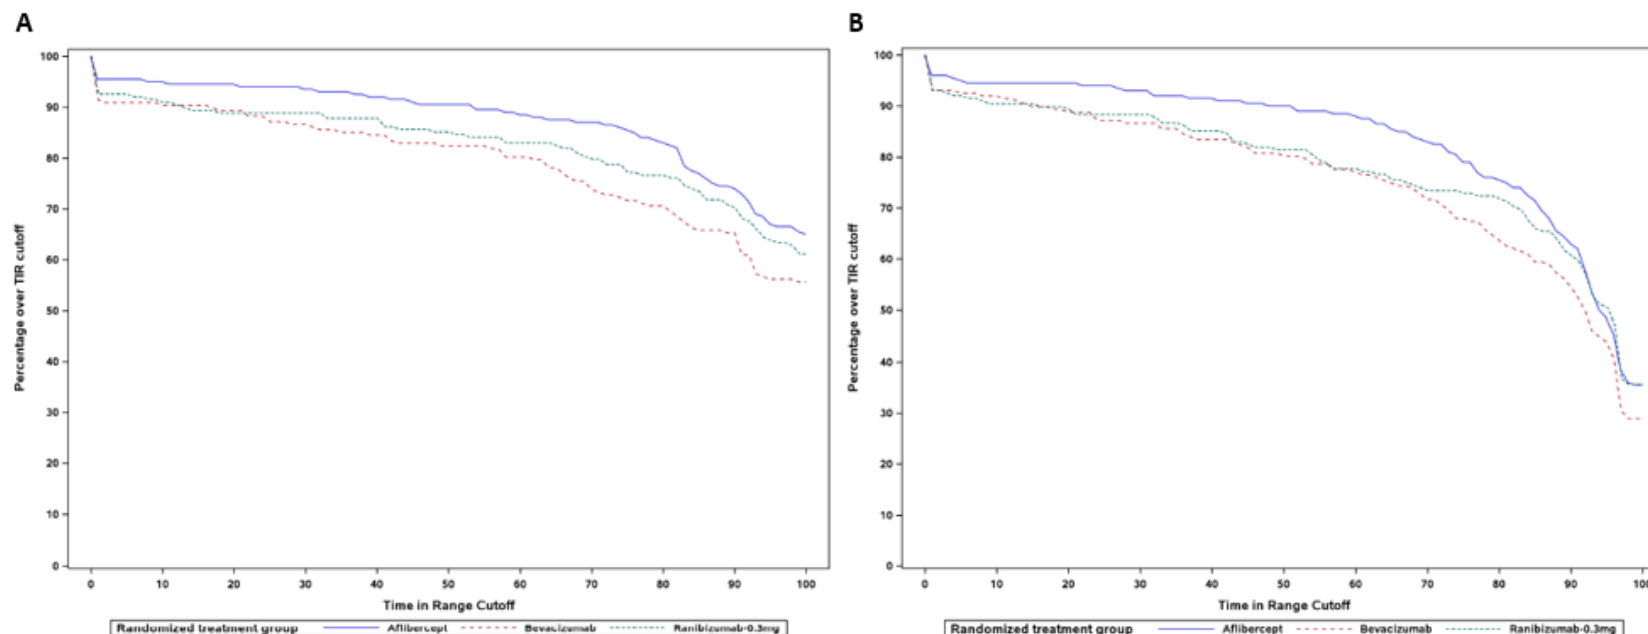

Of the 660 eyes included in Protocol T, 22 eyes were excluded from the Day 0–364 analysis because these participants had  $<7$  BCVA assessments within this timeframe (approximately 1 VA assessment every 2 months); 85 eyes were excluded from the Day 0–728 and Day 365–728 analyses because participants had  $<4$  assessments within Year 2.

BCVA best-corrected visual acuity, TIR time in range, VA visual acuity.
